# Supplementary material
Source: PubMed Central journal article supplement (PMC3868563)
Supplement: NIHMS508286-supplement-1.pdf [file NIHMS508286-supplement-1.pdf]

## SUPPLEMENTAL MATERIAL

**Supplemental Table. Myocardial responses to low-dose (5 µg/kg/min) intravenous dobutamine.**

|                                                                  | Baseline     | Dobutamine    |
|------------------------------------------------------------------|--------------|---------------|
| <b>Myocardial contrast echocardiography</b>                      |              |               |
| Myocardial A, a.u.                                               | 131 ± 7      | 124 ± 6       |
| Myocardial β, s <sup>-1</sup>                                    | 0.7 ± 0.1    | 1.2 ± 0.1*    |
| Myocardial perfusion (A·β), a.u.·s <sup>-1</sup>                 | 95 ± 16      | 145 ± 19*     |
| Myocardial conductance, a.u.·mmHg <sup>-1</sup>                  | 1.3 ± 0.2    | 1.6 ± 0.2*    |
| <b>Hemodynamics</b>                                              |              |               |
| Heart rate, beats·min <sup>-1</sup>                              | 66 ± 3       | 68 ± 4        |
| Systolic Blood Pressure, mmHg                                    | 111 ± 3      | 144 ± 4*      |
| Diastolic Blood Pressure, mmHg                                   | 55 ± 2       | 63 ± 2*       |
| Mean Blood Pressure, mmHg                                        | 74 ± 2       | 90 ± 2*       |
| LV End-diastolic volume, mL                                      | 154 ± 8      | 160 ± 6       |
| LV End-systolic volume, mL                                       | 58 ± 3       | 35 ± 3*       |
| LV Stroke volume, mL                                             | 97 ± 5       | 125 ± 5*      |
| <b>Indices of LV work, function and oxygen demand</b>            |              |               |
| LV Ejection Fraction, %                                          | 63 ± 1       | 78 ± 2*       |
| LV end-systolic elastance, mmHg·mL <sup>-1</sup>                 | 1.8 ± 0.1    | 4.3 ± 0.4*    |
| LV end-systolic wall stress, 10 <sup>3</sup> dyn/cm <sup>2</sup> | 0.9 ± 0.1    | 0.8 ± 0.1     |
| LV stroke work (x10 <sup>-3</sup> ), mmHg·mL <sup>-1</sup>       | 9.2 ± 0.7    | 15.1 ± 1.5*   |
| LV total work, mmHg·mL <sup>-1</sup> ·bpm <sup>-1</sup>          | 120.2 ± 11.5 | 295.7 ± 39.2* |
| MVO <sub>2</sub> , ml·min <sup>-1</sup>                          | 6.8 ± 0.3    | 8.5 ± 0.5*    |

Data reported as mean ± SEM. \*P < 0.05. RBC, red blood cell; LV, left ventricle; MVO<sub>2</sub>, myocardial oxygen consumption

Supplemental Figure

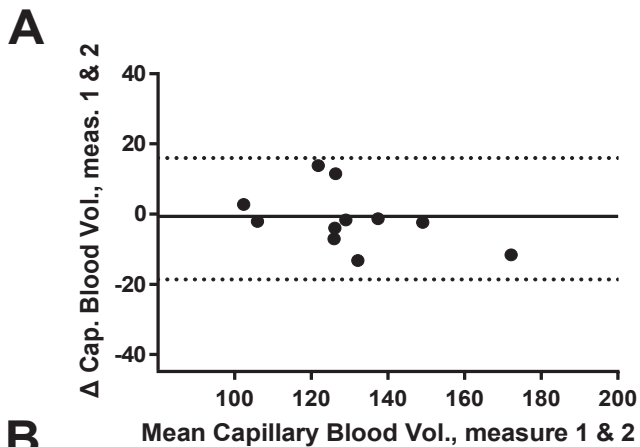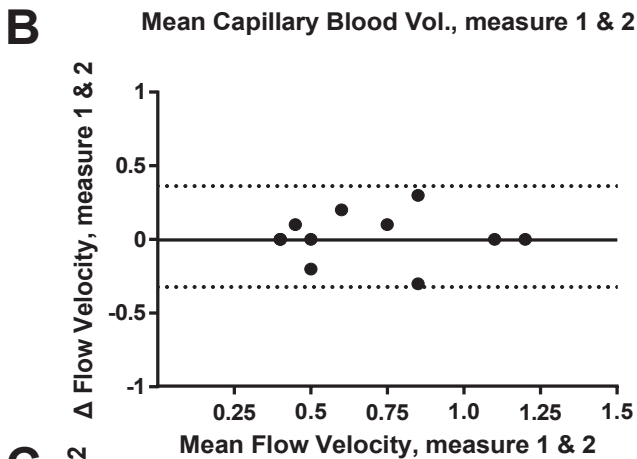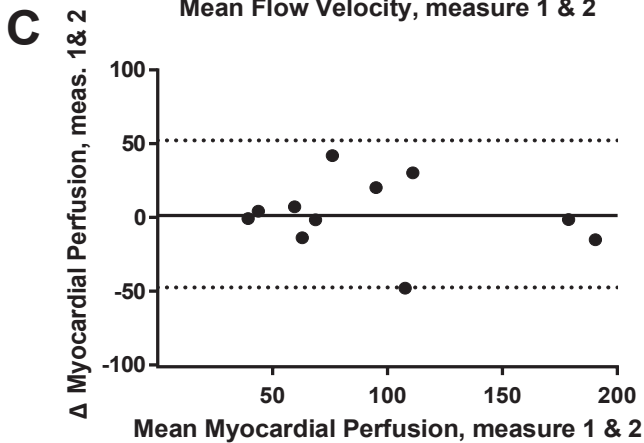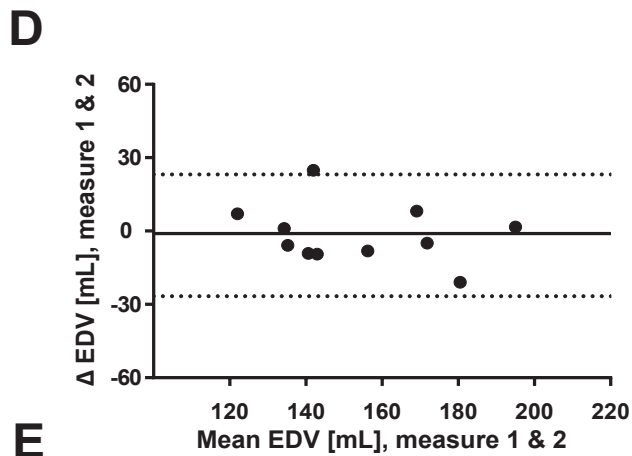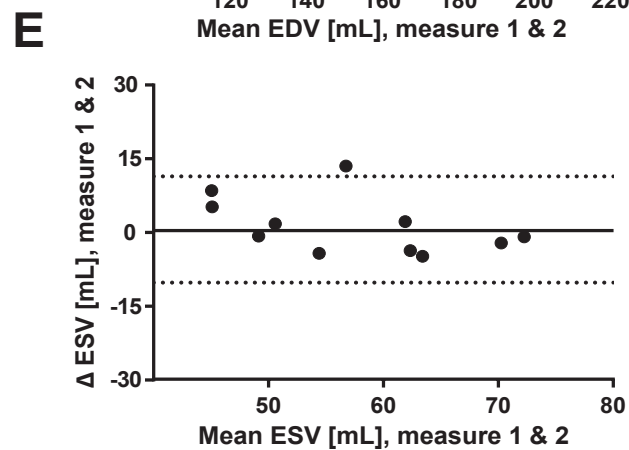

## Supplemental Figure Legend

**Supplemental Figure.** Bland-Altman analysis of intraobserver/measurement variability of myocardial contrast echocardiography showing (A) capillary blood volume, (B) feed artery flow velocity, and (C) myocardial perfusion [ = capillary blood volume x feed artery flow velocity]. Variability of left ventricular volumetric analyses are shown in panel D (end-diastolic volume) and E (end-systolic volume).
